# Supplementary material for: Ozone air quality simulations with WRF-Chem (v3.5.1) over Europe: Model evaluation and chemical mechanism comparison
Source: Copernicus journal article supplement (doi:10.5194/gmd-2016-131), 2016-06-07
Supplement: Supplementary file 1 [file gmd-2016-131-supplement.zip]

Namelist.input for MOZART

```
&time_control
  start_year           = 2006,
  start_month          = 12,
  start_day            = 23,
  start_hour           = 00,
  start_minute         = 00,
  start_second         = 00,
  end_year             = 2008,
  end_month            = 01,
  end_day              = 01,
  end_hour             = 00,
  end_minute          = 00,
  end_second           = 00,
  interval_seconds     = 21600
  input_from_file      = .true.,
  history_interval     = 60,
  iofields_filename    = "iofields",
  frames_per_outfile   = 24,
  frames_per_auxinput5 = 1,
  restart              = .false.,
  restart_interval     = 1440,
  io_form_history      = 2
  io_form_restart      = 2
  io_form_input        = 2
  io_form_boundary     = 2
  debug_level          = 300
  auxinput6_inname     = 'wrfbiochemi_d01',
  auxinput7_inname     =
'wrffirechemi_d<domain>_<date>',
  auxinput5_interval_m = 60,
  auxinput7_interval_m = 60, 60, 60,
  io_form_auxinput2    = 2,
  io_form_auxinput4    = 2,
  auxinput4_inname     = "wrflowinp_d<domain>"
  auxinput4_interval   = 360
  io_form_auxinput5    = 2,
  io_form_auxinput6    = 2,
  io_form_auxinput7    = 2,
  io_form_auxinput8    = 0,
  override_restart_timers = .true.,
  write_hist_at_0h_rst = .true.
  frames_per_auxinput5 = 1, 1, 12,
  frames_per_auxinput6 = 1, 1, 1,
  frames_per_auxinput7 = 1, 1, 1,

/

&dfi_control
/
```

```

&domains
  time_step                = 180,
  time_step_fract_num      = 0,
  time_step_fract_den      = 1,
  max_dom                  = 1,
  s_we                     = 1,
  e_we                     = 115,
  s_sn                     = 1,
  e_sn                     = 100,
  s_vert                   = 1,
  e_vert                   = 35,
  num_metgrid_levels       = 38,
  eta_levels               = 1.000, 0.993, 0.983,
  0.970, 0.954,
                                0.934, 0.909, 0.880,
  0.845, 0.807,
                                0.765, 0.719, 0.672,
  0.622, 0.571,
                                0.520, 0.468, 0.420,
  0.376, 0.335,
                                0.298, 0.263, 0.231,
  0.202, 0.175,
                                0.150, 0.127, 0.106,
  0.088, 0.070,
                                0.055, 0.040, 0.026,
  0.013, 0.000,
  dx                       = 45000,
  dy                       = 45000,
  grid_id                  = 1,
  parent_id                = 1,
  i_parent_start           = 1,
  j_parent_start           = 1,
  parent_grid_ratio        = 1,
  parent_time_step_ratio   = 1,
  feedback                 = 0,
  smooth_option            = 0
/

&physics
  mp_physics               = 2,      4,      4,
  ra_lw_physics            = 4,      1,      1,
  ra_sw_physics            = 2,      2,      2,
  radt                    = 30,     15,     15,
  sf_sfclay_physics        = 1,      1,      1,
  sf_surface_physics       = 2,      2,      2,
  bl_pbl_physics           = 1,      1,      1,
  bldt                    = 0,      0,      0,
  cu_physics               = 5,      1,      1,
  cu_rad_feedback          = .false.,
  cudt                    = 0,      0,      0,
  isfflx                   = 1,
  ifsnow                   = 1,

```

```

icloud                      = 1,
surface_input_source        = 1,
num_soil_layers             = 4,
mp_zero_out                 = 2,
mp_zero_out_thresh         = 1.e-12,
sf_urban_physics            = 1,      0,      0,
maxiens                     = 1,
maxens                      = 3,
maxens2                     = 3,
maxens3                     = 16,
ensdim                      = 144,
sst_update                  = 1,
usemonalb                   = .true.,
progn                       = 1,      0,      0,
cu_diag                     = 1,
num_land_cat                = 28,
/

&fdda
grid_fdda                   = 1, 1, 1
gfdda_inname                = "wrffdda_d<domain>"
gfdda_interval_m            = 360, 360, 360,
gfdda_end_h                 = 800000, 3000, 750,
io_form_gfdda               = 2,
fgdt                        = 0, 0, 0,
if_no_pbl_nudging_uv        = 1, 0, 0,
if_no_pbl_nudging_t         = 0, 0, 0,
if_no_pbl_nudging_q         = 0, 0, 0,
if_zfac_uv                  = 0, 0, 0,
k_zfac_uv                   = 10, 10, 10,
if_zfac_t                   = 0, 0, 0,
k_zfac_t                    = 10, 10, 10,
if_zfac_q                   = 0, 0, 0,
k_zfac_q                    = 10, 10, 10,
guv                         = 0.0003, 0.0006, 0.0006,
gt                          = 0.0003, 0.0006, 0.0006,
gq                          = 0.0000, 0, 0,
if_ramping                  = 1
dtramp_min                  = 60
/

&dynamics
rk_ord                      = 3,
w_damping                   = 1,
diff_opt                    = 1,
km_opt                      = 4,
diff_6th_opt                = 0,
diff_6th_factor             = 0.12,
base_temp                   = 290.
damp_opt                    = 0,
zdamp                      = 5000., 5000., 5000.,
dampcoef                    = 0.01, 0.01, 0.01

```

|                          |            |          |          |
|--------------------------|------------|----------|----------|
| khdif                    | = 0,       | 0,       | 0,       |
| kvdif                    | = 0,       | 0,       | 0,       |
| non_hydrostatic          | = .true.,  | .true.,  | .true.,  |
| moist_adv_opt            | = 2,       | 0,       | 0,       |
| scalar_adv_opt           | = 2,       | 0,       | 0,       |
| chem_adv_opt             | = 2,       | 2,       | 2,       |
| tke_adv_opt              | = 2,       | 0,       | 0,       |
| time_step_sound          | = 4,       | 4,       | 4,       |
| h_mom_adv_order          | = 5,       | 5,       | 5,       |
| v_mom_adv_order          | = 3,       | 3,       | 3,       |
| h_sca_adv_order          | = 5,       | 5,       | 5,       |
| v_sca_adv_order          | = 3,       | 3,       | 3,       |
| /                        |            |          |          |
| &bdy_control             |            |          |          |
| spec_bdy_width           | = 5,       |          |          |
| spec_zone                | = 1,       |          |          |
| relax_zone               | = 4,       |          |          |
| specified                | = .true.,  | .false., | .false., |
| nested                   | = .false., | .true.,  | .true.,  |
| /                        |            |          |          |
| &grib2                   |            |          |          |
| /                        |            |          |          |
| &namelist_quilt          |            |          |          |
| nio_tasks_per_group = 0, |            |          |          |
| nio_groups = 1,          |            |          |          |
| /                        |            |          |          |
| &chem                    |            |          |          |
| kemit                    | = 7,       |          |          |
| ne_area                  | = 120,     |          |          |
| chem_opt                 | = 112,     |          |          |
| bioemdt                  | = 30.,     |          |          |
| photdt                   | = 30,      |          |          |
| chemdt                   | = 4.,      |          |          |
| io_style_emissions       | = 2,       |          |          |
| emiss_inpt_opt           | = 1,       |          |          |
| emiss_opt                | = 8,       |          |          |
| chem_in_opt              | = 0,       |          |          |
| phot_opt                 | = 3,       |          |          |
| gas_drydep_opt           | = 1,       |          |          |
| aer_drydep_opt           | = 1,       |          |          |
| bio_emiss_opt            | = 3,       |          |          |
| gas_bc_opt               | = 1,       |          |          |
| gas_ic_opt               | = 1,       |          |          |
| aer_bc_opt               | = 1,       |          |          |
| aer_ic_opt               | = 1,       |          |          |
| gaschem_onoff            | = 1,       |          |          |
| aerchem_onoff            | = 1,       |          |          |
| wetscav_onoff            | = 0,       |          |          |

|                   |           |
|-------------------|-----------|
| cldchem_onoff     | = 0,      |
| vertmix_onoff     | = 1,      |
| chem_conv_tr      | = 1,      |
| seas_opt          | = 2,      |
| dust_opt          | = 3,      |
| biomass_burn_opt  | = 2,      |
| plumerisefire_frq | = 30,     |
| scale_fire_emiss  | = .true., |
| have_bcs_chem     | = .true., |
| aer_ra_feedback   | = 0,      |
| aer_op_opt        | = 1,      |
| opt_pars_out      | = 0,      |
| diagnostic_chem   | = 0,      |
| chemdiag          | = 1,      |
| /                 |           |

namelist.input for RADM2

```
&time_control
  start_year           = 2006,
  start_month          = 12,
  start_day            = 23,
  start_hour           = 00,
  start_minute         = 00,
  start_second         = 00,
  end_year             = 2008,
  end_month            = 01,
  end_day              = 01,
  end_hour             = 00,
  end_minute          = 00,
  end_second           = 00,
  interval_seconds     = 21600
  input_from_file      = .true.,
  history_interval     = 60,
  iofields_filename    = "iofields",
  frames_per_outfile   = 24,
  frames_per_auxinput5 = 1,
  restart              = .false.,
  restart_interval     = 4320,
  io_form_history      = 2
  io_form_restart      = 2
  io_form_input        = 2
  io_form_boundary     = 2
  debug_level          = 300
  auxinput6_inname     = 'wrfbiochemi_d01',
  auxinput7_inname     =
'wrffirechemi_d<domain>_<date>',
  auxinput5_interval_m = 60,
  auxinput7_interval_m = 60, 60, 60,
  io_form_auxinput2    = 2,
  io_form_auxinput4    = 2,
  auxinput4_inname     = "wrflowinp_d<domain>"
  auxinput4_interval   = 360
  io_form_auxinput5    = 2,
  io_form_auxinput6    = 2,
  io_form_auxinput7    = 2,
  io_form_auxinput8    = 0,
  override_restart_timers = .true.,
  write_hist_at_0h_rst = .true.
  frames_per_auxinput5 = 1, 1, 12,
  frames_per_auxinput6 = 1, 1, 1,
  frames_per_auxinput7 = 1, 1, 1,

/

&dfi_control
/
```

```

&domains
  time_step                = 180,
  time_step_fract_num      = 0,
  time_step_fract_den      = 1,
  max_dom                  = 1,
  s_we                     = 1,
  e_we                     = 115,
  s_sn                     = 1,
  e_sn                     = 100,
  s_vert                   = 1,
  e_vert                   = 35,
  num_metgrid_levels       = 38,
  eta_levels               = 1.000, 0.993, 0.983,
  0.970, 0.954,
                                0.934, 0.909, 0.880,
  0.845, 0.807,
                                0.765, 0.719, 0.672,
  0.622, 0.571,
                                0.520, 0.468, 0.420,
  0.376, 0.335,
                                0.298, 0.263, 0.231,
  0.202, 0.175,
                                0.150, 0.127, 0.106,
  0.088, 0.070,
                                0.055, 0.040, 0.026,
  0.013, 0.000,
  dx                       = 45000,
  dy                       = 45000,
  grid_id                  = 1,
  parent_id                = 1,
  i_parent_start           = 1,
  j_parent_start           = 1,
  parent_grid_ratio        = 1,
  parent_time_step_ratio   = 1,
  feedback                 = 0,
  smooth_option            = 0
/

&physics
  mp_physics               = 2,      4,      4,
  ra_lw_physics            = 4,      1,      1,
  ra_sw_physics            = 2,      2,      2,
  radt                    = 30,     15,     15,
  sf_sfclay_physics        = 1,      1,      1,
  sf_surface_physics       = 2,      2,      2,
  bl_pbl_physics           = 1,      1,      1,
  bldt                    = 0,      0,      0,
  cu_physics               = 5,      1,      1,
  cu_rad_feedback          = .false.,
  cudt                    = 0,      0,      0,
  isfflx                   = 1,
  ifsnow                   = 1,

```

```

icloud                      = 1,
surface_input_source        = 1,
num_soil_layers             = 4,
mp_zero_out                 = 2,
mp_zero_out_thresh         = 1.e-12,
sf_urban_physics            = 1,      0,      0,
maxiens                     = 1,
maxens                      = 3,
maxens2                     = 3,
maxens3                     = 16,
ensdim                      = 144,
sst_update                  = 1,
usemonalb                   = .true.,
progn                       = 1,      0,      0,
cu_diag                     = 1,
num_land_cat                = 28,
/

&fdda
grid_fdda                   = 1, 1, 1
gfdda_inname                 = "wrffdda_d<domain>"
gfdda_interval_m            = 360, 360, 360,
gfdda_end_h                 = 800000, 3000, 750,
io_form_gfdda               = 2,
fgdt                         = 0, 0, 0,
if_no_pbl_nudging_uv        = 1, 0, 0,
if_no_pbl_nudging_t         = 0, 0, 0,
if_no_pbl_nudging_q         = 0, 0, 0,
if_zfac_uv                  = 0, 0, 0,
k_zfac_uv                   = 10, 10, 10,
if_zfac_t                   = 0, 0, 0,
k_zfac_t                    = 10, 10, 10,
if_zfac_q                   = 0, 0, 0,
k_zfac_q                    = 10, 10, 10,
guv                          = 0.0003, 0.0006, 0.0006,
gt                           = 0.0003, 0.0006, 0.0006,
gq                           = 0.0000, 0, 0,
if_ramping                  = 1
dtramp_min                   = 60
/

&dynamics
rk_ord                       = 3,
w_damping                    = 1,
diff_opt                     = 1,
km_opt                       = 4,
diff_6th_opt                 = 0,
diff_6th_factor              = 0.12,
base_temp                    = 290.
damp_opt                     = 0,
zdamp                        = 5000., 5000., 5000.,
dampcoef                     = 0.01, 0.01, 0.01

```

|                          |            |          |          |
|--------------------------|------------|----------|----------|
| khdif                    | = 0,       | 0,       | 0,       |
| kvdif                    | = 0,       | 0,       | 0,       |
| non_hydrostatic          | = .true.,  | .true.,  | .true.,  |
| moist_adv_opt            | = 2,       | 0,       | 0,       |
| scalar_adv_opt           | = 2,       | 0,       | 0,       |
| chem_adv_opt             | = 2,       | 2,       | 2,       |
| tke_adv_opt              | = 2,       | 0,       | 0,       |
| time_step_sound          | = 4,       | 4,       | 4,       |
| h_mom_adv_order          | = 5,       | 5,       | 5,       |
| v_mom_adv_order          | = 3,       | 3,       | 3,       |
| h_sca_adv_order          | = 5,       | 5,       | 5,       |
| v_sca_adv_order          | = 3,       | 3,       | 3,       |
| /                        |            |          |          |
| &bdy_control             |            |          |          |
| spec_bdy_width           | = 5,       |          |          |
| spec_zone                | = 1,       |          |          |
| relax_zone               | = 4,       |          |          |
| specified                | = .true.,  | .false., | .false., |
| nested                   | = .false., | .true.,  | .true.,  |
| /                        |            |          |          |
| &grib2                   |            |          |          |
| /                        |            |          |          |
| &namelist_quilt          |            |          |          |
| nio_tasks_per_group = 0, |            |          |          |
| nio_groups = 1,          |            |          |          |
| /                        |            |          |          |
| &chem                    |            |          |          |
| kemit                    | = 7,       |          |          |
| ne_area                  | = 55,      |          |          |
| chem_opt                 | = 106,     |          |          |
| bioemdt                  | = 30.,     |          |          |
| photdt                   | = 30,      |          |          |
| chemdt                   | = 4.,      |          |          |
| io_style_emissions       | = 2,       |          |          |
| emiss_inpt_opt           | = 1,       |          |          |
| emiss_opt                | = 3,       |          |          |
| chem_in_opt              | = 0,       |          |          |
| phot_opt                 | = 1,       |          |          |
| gas_drydep_opt           | = 1,       |          |          |
| aer_drydep_opt           | = 1,       |          |          |
| bio_emiss_opt            | = 3,       |          |          |
| gas_bc_opt               | = 1,       |          |          |
| gas_ic_opt               | = 1,       |          |          |
| aer_bc_opt               | = 1,       |          |          |
| aer_ic_opt               | = 1,       |          |          |
| gaschem_onoff            | = 1,       |          |          |
| aerchem_onoff            | = 1,       |          |          |
| wetscav_onoff            | = 0,       |          |          |

|                   |           |
|-------------------|-----------|
| cldchem_onoff     | = 0,      |
| vertmix_onoff     | = 1,      |
| chem_conv_tr      | = 1,      |
| seas_opt          | = 2,      |
| dust_opt          | = 3,      |
| biomass_burn_opt  | = 2,      |
| plumerisefire_frq | = 30,     |
| have_bcs_chem     | = .true., |
| aer_ra_feedback   | = 0,      |
| aer_op_opt        | = 1,      |
| opt_pars_out      | = 0,      |
| diagnostic_chem   | = 0,      |
| chemdiag          | = 1,      |
| /                 |           |
